1 **Bias in community-weighted mean analysis of plant functional traits and**  
2 **species indicator values**

3 David Zelený (ORCID: 0000-0001-5157-044X)

4 Institute of Ecology and Evolutionary Biology, National Taiwan University, Roosevelt Rd. 1,  
5 Taipei 10617, Taiwan

6 email: [zeleny@ntu.edu.tw](mailto:zeleny@ntu.edu.tw)

7 **# Running head:** Bias in CWM analysis

8 **Abstract**

9 One way to analyze the relationship between species attributes and sample attributes via the  
10 matrix of species composition is to calculate the community-weighted mean of species attributes  
11 (CWM) and relate it to sample attributes by correlation, regression or ANOVA. This *weighted-*  
12 *mean approach* is frequently used by vegetation ecologists to relate species attributes like plant  
13 functional traits or Ellenberg-like species indicator values to sample attributes like measured  
14 environmental variables, biotic properties, species richness or sample scores in ordination  
15 analysis.

16 The problem with the weighted-mean approach is that, in certain cases, it yields biased  
17 results in terms of both effect size and *P*-values, and this bias is contingent upon the beta  
18 diversity of the species composition data. The reason is that CWM values calculated from  
19 samples of communities sharing some species are not independent of each other. This influences

20 the number of effective degrees of freedom, which is usually lower than the actual number of  
21 samples, and the difference further increases with decreasing beta diversity of the data set. The  
22 discrepancy between the number of effective degrees of freedom and the number of samples in  
23 analysis turns into biased effect sizes and an inflated Type I error rate in those cases where the  
24 significance of the relationship is tested by standard tests, a problem which is analogous to  
25 analysis of two spatially autocorrelated variables. Consequently, results of studies using rather  
26 homogeneous (although not necessarily small) compositional data sets may be overly optimistic,  
27 and effect sizes of studies based on data sets differing by their beta diversity are not directly  
28 comparable.

29 Here, I introduce guidelines on how to decide in which situation the bias is actually a  
30 problem when interpreting results, recognizing that there are several types of species and sample  
31 attributes with different properties and that ecological hypotheses commonly tested by the  
32 weighted-mean approach fall into one of three broad categories. I also compare available  
33 analytical solutions accounting for the bias (modified permutation test and sequential  
34 permutation test using the fourth-corner statistic) and suggest rules for their use.

35

36 **Keywords:** Degrees of freedom; Ellenberg indicator values; Fourth-corner approach; Modified  
37 permutation test; Sequential test with fourth-corner statistic; Spatial autocorrelation.

38 **Abbreviations:** CWM – community-weighted mean.

39

## 40 **Introduction**

41 A common task of community ecologists is to relate species attributes (like species functional  
42 traits) to sample attributes (such as environmental variables) using data about species  
43 composition of local community samples. One way to do it is by calculating the community-  
44 weighted mean (CWM) of species attributes for each sample, relate it directly to sample  
45 attributes by correlation, regression or ANOVA, and test the significance of this relationship.  
46 Although frequently used, this *weighted-mean approach* has some serious limitations, and  
47 researchers using it should be aware of them. Most notably, in situations discussed here in detail,  
48 the results appear more optimistic than they in reality are, i.e. they are biased in terms of  
49 estimated effect size and Type I error rate.

50 Generally, in weighted-mean approach, *species attributes* could be species properties  
51 (traits), behavior (species ecological optima) or phylogenetic age, while *sample attributes* are  
52 measured or estimated characteristics of community samples (environmental variables) or  
53 variables derived from a matrix of species composition (like species richness or positions of  
54 samples in ordination diagrams). In vegetation ecology, the two types of broadly used species  
55 attributes are plant functional traits and species indicator values. CWMs of plant functional traits  
56 can be related to environmental variables to demonstrate the effect of environmental filtering on  
57 trait-mediated community assembly (Díaz et al. 1998; Shipley 2010), or to predict changes in  
58 ecosystem properties, such as biomass production or nutrient cycling (Garnier et al. 2004; Vile et  
59 al. 2006), or ecosystem services like fodder production or maintenance of soil fertility (Díaz et al.  
60 2007). CWMs of species indicator values (e.g. those of Ellenberg et al. 1992) are used to  
61 estimate habitat conditions from known species composition of vegetation samples, and these

62 estimates are often related to soil, light or climatic variables (Schaffers & Sýkora 2000) or used  
63 for ecological interpretation of compositional changes (e.g. by relating them to axes of  
64 unconstrained ordination, Persson 1981). Other, more specific examples include relating the  
65 community specialization index (CSI, mean of species specialization values weighted by their  
66 dominance in the community) to environmental variables (Clavero & Brotons 2010; Fajmonová  
67 et al. 2013; Carboni et al. 2016), or attempts to verify whether plant biomass can be estimated  
68 from tabulated plant heights and species composition as the mean of species heights weighted by  
69 their cover in a plot (Axmanová et al. 2012).

70         Weighted-mean approach is also used in other fields, like biogeography (relating grid-  
71 based means of species properties, such as animal body size, to macroclimate or diversity;  
72 Hawkins & Diniz-Filho 2006), hydrobiology (relating trophic diatom index based on weighted  
73 mean of diatom indicator values to measured water quality parameters to assess its reliability;  
74 Kelly & Whitton 1995), or paleoecology (one of the transfer functions used to reconstruct  
75 acidification of lakes from fossil diatom assemblages preserved in lake sediments is based on  
76 weighted means of diatom optima along the pH gradient; ter Braak & Barendregt 1986; Birks et  
77 al. 1990).

78         Although the weighted-mean approach technically relates two sets of variables (CWM  
79 and sample attributes), three matrices are in fact involved in the computation background  
80 (notation here follows the RLQ analysis of Dolédec et al. 1996): matrix of *sample attributes* **R**  
81 with  $m$  sample attributes of  $n$  samples ( $n \times m$ ); matrix of *species composition* **L** with abundance  
82 (or presence-absence) of  $p$  species in  $n$  samples ( $n \times p$ ); and matrix of *species attributes* **Q** with  $s$

83 species attributes for  $p$  species ( $s \times p$ ). The weighted-mean approach is just one of the possible  
84 options for relating species attributes (**Q**) to sample attributes (**R**) via a matrix of species  
85 composition (**L**): it combines **Q** with **L** into a matrix of weighted-means (**M**) and relates it to **R**.  
86 An alternative solution is to combine a matrix of sample attributes **R** with species composition **L**  
87 by calculating the weighted-mean of sample attributes (optima of individual species along a  
88 given sample attribute or species centroids) and relate these values to species attributes **Q** (e.g.  
89 ter Braak & Looman 1986). The third option is to use methods suitable for simultaneously  
90 handling all three matrices (**R**, **L** and **Q**), such as the *fourth-corner approach* (Legendre et al.  
91 1997), the related ordination method, called RLQ analysis (Dolédec et al. 1996), or other  
92 alternatives (Jamil et al. 2013, Brown et al. 2014).

93 In the weighted-mean approach, the relationship between CWM and sample attributes,  
94 after being analyzed by correlation, regression or ANOVA, is often tested by a standard  
95 parametric or permutation test (called simply *standard test* throughout this study). However, as  
96 will be demonstrated further in this paper, not all types of ecological questions analyzed by the  
97 weighted-mean approach should be tested by the standard test, since it may generate biased  
98 results. This problem was pointed out by Jansen et al. (2011) and Zelený & Schaffers (2012) in  
99 the context of mean Ellenberg indicator values, by Peres-Neto et al. (2012, 2016) in the context  
100 of metacommunity phylogenetics and species functional traits, by Šmilauer & Lepš (2014, p. 158)  
101 in the context of the CWM-RDA method (Nygaard & Ejmaes 2004), and by Hawkins et al.  
102 (2017) in the macroecological context. Zelený & Schaffers (2012) suggested to solve the bias by  
103 *modified permutation test*, an alternative to the standard permutation test between CWM and  
104 sample attributes, in which species attributes instead of sample attributes are permuted. Peres-

105 Neto et al. (2016) introduced *sequential test* (ter Braak et al. 2012), using the *fourth-corner*  
106 statistic (Legendre et al. 1997).

107 Here, I justify the source of the bias, among others also using an analogy with the bias in  
108 the analysis of spatially autocorrelated data, and clarify when the bias is an issue and when it is  
109 not. For this, I define several types of species and sample attributes, differing by their origin and  
110 relationship to a matrix of species composition. Then I review which ecological questions and  
111 null hypotheses are commonly analyzed by the weighted-mean approach and sort them into three  
112 broad categories. Using simulated data, I show for which of these categories there is a risk of  
113 biased results if tested by standard test and how this bias depends on the beta diversity of species  
114 composition matrix. Finally, I review and compare methods available for solving the problem of  
115 inflated Type I error rate in the weighted-mean approach, namely the *modified permutation test*  
116 (Zelený & Schaffers 2012) and the *sequential permutation test* based on the *fourth-corner*  
117 *statistic* (Peres-Neto et al. 2016), and suggest guidelines for their use. Although all examples and  
118 reasoning used here are focused on the relationship of species functional traits or Ellenberg-like  
119 species indicator values with sample attributes analyzed by the weighted-mean approach, the  
120 general concept is also valid for other types of species and sample attributes linked by the  
121 weighted-mean approach.

122

### 123 **Justification of the bias**

124 Since the CWM of species attributes are calculated from species attributes assigned to individual  
125 species and from species composition of individual community samples, they inherit information

126 from both sources. The numerical difference between CWM values calculated from two  
127 community samples is necessarily constrained by a difference in their species composition. Two  
128 samples with identical species composition (or, more precisely, identical relative species  
129 abundances) have identical calculated weighted-means, and two samples with slightly different  
130 species composition have CWM values rather similar. Therefore, two CWM values are not  
131 independent from each other if they are calculated from samples that share some species, and  
132 they do not bring two independent degrees of freedom into the analysis. This is because the  
133 CWM value of one sample is to some extent predictable from the CWM of the other sample  
134 from known differences in their species composition. If sample attributes are also in some  
135 predictable way related to species composition and therefore not independent from each other,  
136 their analysis with CWM becomes problematic. Since for standard parametric test the number of  
137 degrees of freedom is important for choosing the correct statistical distribution for a given  
138 sample size, disparity between the real number and effective number of samples (and degrees of  
139 freedom) leads to the selection of narrower confidence intervals and hence a higher probability  
140 of obtaining significant results (Legendre & Legendre 2012). This problem scales up to the data  
141 set level: in the case of two compositional data sets with the same number of samples used in the  
142 weighted-mean approach, the one with lower beta diversity (with samples sharing more species)  
143 has a lower number of effective degrees of freedom compared to the one with higher beta  
144 diversity.

145         The source of bias in weighted-mean approach can also be understood from the analogy  
146 with analysis of the relationship between two spatially autocorrelated variables. For each  
147 spatially autocorrelated variable, samples located nearby in geographical space have more

148 similar values than expected if the values are randomly selected, and therefore they are not  
149 statistically independent (Legendre 1993). A new observation does not bring entirely new  
150 information, because its value can be partly derived from the value observed at a nearby site, and  
151 the effective number of samples (and the effective number of degrees of freedom) is lower than  
152 the real number of samples. If both variables are spatially autocorrelated, analysis of their  
153 relationship will yield biased results (unreliable effect size and inflated Type I error rate;  
154 Legendre 1993). If only one or none of the variable are spatially autocorrelated, the bias caused  
155 by autocorrelation does not appear. In the case of the weighted-mean approach, it is not the  
156 proximity in a geographical space, but the proximity in a compositional space, which reflects  
157 compositional similarities between pairs of samples. Compositional space can be imagined as an  
158 ordination diagram in which distances between plots reflect their composition dissimilarity. The  
159 bias is present only if *both variables* (CWM and sample attributes) are autocorrelated in the  
160 compositional space, i.e. if CWM values are calculated from species composition data in which  
161 some samples share some species, and sample attributes are (in some predictable way) related to  
162 species composition. If either CWM values or sample attributes (or both) are not linked to  
163 species composition, the issue with a bias does not apply. For CWM values, this can happen in  
164 the (rather unlikely) case that individual samples in the species composition matrix do not share  
165 any species and calculated CWM values are therefore completely independent from each other.  
166 For sample attributes, the question how to recognize whether they are (or should be regarded as)  
167 linked to species composition will be elaborated in the next section.

168



## 169 **Types of species and sample attributes**

170 When considering alternative types of questions commonly analyzed by the weighted-mean  
171 approach, it proves useful to classify species and sample attributes according to their relationship  
172 to the matrix of species composition ( $\mathbf{L}$ ) as *internal* or *external*, and *linked* or *not linked* (to  
173 species composition). While the *internal/external* distinction refers to the origin of attributes  
174 (whether they are numerically derived from the matrix of species composition or not), the  
175 *linked/not linked* distinction depends on an assumed link of these attributes to the matrix of  
176 species composition.

177 *Internal* attributes are numerically (or in another deterministic way) derived from the  
178 matrix of species composition, while *external* attributes are typically measured or estimated  
179 variables obtained independently on the matrix of species composition. *Internal species*  
180 attributes are, e.g., species optima calculated as the weighted means of sample attributes or as  
181 species scores on ordination axes, and similarly *internal sample* attributes are sample scores on  
182 ordination axes, species richness of individual samples or the assignment of samples into groups  
183 based on compositional similarity (e.g. by numerical classification or by expert assignment based  
184 on actual species composition). *External species* attributes, on the other hand, are measured traits  
185 or tabulated species indicator values, and *external sample* attributes are measured or estimated  
186 environmental variables or assignment of samples to experimental treatments.

187 The distinction between attributes *linked* or *not linked* to the matrix of species  
188 composition is more subtle and depends on the context of the study. The link of (species or  
189 sample) attributes to the matrix of species composition can be acknowledged explicitly by the

190 hypothesis we aim to test (e.g. we assume that studied traits are functional, which is why we  
191 consider them as linked to the matrix of species composition), or implicitly by the context of the  
192 study (e.g. from the experimental design). To help with the decision whether attributes are linked  
193 to species composition or not, we may ask whether it would be relevant to randomize given  
194 attributes for the purpose of testing the null hypothesis; such randomization breaks the link of  
195 (species or sample) attributes to species composition and allows to test whether the real (not  
196 randomized) attributes are linked to species composition. Those attributes, for which  
197 randomization is not relevant, should be considered as linked to species composition. From this  
198 logic, *internal* attributes should always be considered as linked to species composition, because  
199 it would not be relevant to randomize them (the null hypothesis “attributes derived from species  
200 composition are not linked to species composition” would be easy to reject). Attributes *not*  
201 *linked* to species composition are those which are not acknowledged (explicitly or implicitly) by  
202 the tested hypothesis or context of the study, and whose randomization would be relevant. *Linked*  
203 *species attributes* are, for example, species traits which are directly measured on individuals of  
204 given dataset and are considered as functional, i.e. directly influencing species performance.  
205 *Linked sample attributes* are assignments of plots into categories of experimental design (e.g. in  
206 fertilized experiment) in case that we are not questioning the effect of treatments on species  
207 composition, but instead asking how is this effect reflected by changes in species attributes (e.g.  
208 by Ellenberg-like species indicator values or traits). Examples in categories of internal species  
209 and sample attributes listed in the previous paragraphs are also examples of linked species and  
210 sample attributes, respectively. An example of *not-linked species attributes* are Ellenberg-like  
211 indicator values, which usually originate from a different context (independent from analyzed

212 compositional data set) and even different regions. *Not-linked sample attributes* are various  
213 measured or estimated environmental factors and variables derived from GIS layers.

214 Sometimes the decision whether given attribute is external or internal and linked or not  
215 linked to species composition may be rather subjective. For example, an assignment of samples  
216 into habitat or vegetation types could be considered as external sample attribute (not linked to  
217 species composition). However, if this assignment is based on actual species composition of  
218 samples (or even derived from numerical classification of species composition matrix), it would  
219 be more relevant to consider them as internal sample attributes (and hence linked to species  
220 composition). Similarly, species traits, which are compiled from extensive trait databases for  
221 which we are unsure whether they are functional or not, should in most cases be considered as  
222 not linked to species composition, since there is not enough justification to think otherwise.

223

### 224 **Three categories of hypotheses tested by weighted-mean approach**

225 Considering the distinction between linked and not-linked (sample or species) attributes,  
226 hypotheses commonly tested by the weighted-mean approach fall into one of the three categories  
227 (see Table 1 for a summary). *Category A* assumes that species attributes are not linked, and  
228 sample attributes are linked to the matrix of species composition. The assumption of *category B*  
229 is opposite, with species attributes linked, and sample attributes not linked. Finally, *category C*  
230 does not assume any link of either species or sample attributes to the matrix of species  
231 composition. Below, I review assumptions of ecological questions in individual categories,

232 formulate the null hypotheses which are being tested, and suggest some examples for each of  
233 them.

234 *Category A – sample attributes linked to species composition*

235 Ecological questions in this category explicitly acknowledge the link between sample attributes  
236 and species composition, or the link is implicit from the context or the numerical background of  
237 the study. What is tested here is the link of species attributes to species composition. The null  
238 hypothesis states that species attributes are not linked to species composition, while the  
239 alternative hypothesis states that they are. This category includes studies focused on relating  
240 CWM to internal sample attributes, i.e. those derived numerically from the matrix of species  
241 composition (and therefore linked to it). Examples include relating mean Ellenberg indicator  
242 values to sample scores in unconstrained ordination to interpret the ecological meaning of  
243 ordination axes (Zelený & Schaffers 2012) or relating mean trait values to species richness  
244 (Hawkins et al. 2017). Studies with external sample attributes fall into this category if the sample  
245 attributes are considered linked to species composition, as is the case of experimental study in  
246 which the effect of experimental treatment (sample attribute) is acknowledged, and the question  
247 is about the response of CWM to it. An example includes the test how mean Ellenberg values  
248 reflect the changes in grassland species composition following experimental fertilizer application  
249 (Chytrý et al. 2009). An additional level of complexity is added in studies dealing with grid data  
250 where both CWM and internal sample attributes (e.g. species richness derived from community  
251 data) are spatially autocorrelated due to the spatial coherence of species distribution (Hawkins et  
252 al. 2017).

253 *Category B – species attributes linked to species composition*

254 Studies in this category explicitly assume that the species attributes are linked to species  
255 composition, and the test focuses on the link of sample attributes to species composition. The  
256 null hypothesis states that sample attributes are not linked to species composition, while  
257 alternative hypothesis states they are. Examples are trait-based studies asking whether species  
258 traits can explain the effect of environmental filtering on species abundance in a community.  
259 These studies operate with an assumption that traits (species attributes) are functional, i.e. they  
260 influence the abundance of species in a community, and the question which is tested is whether  
261 the sample attributes (environmental variables) act as an environmental filter on species  
262 abundance. Studies using internal species attributes (derived from species composition, e.g. as  
263 the weighted-mean of sample attributes or as scores on ordination axes) also belong to this  
264 category.

265 *Category C – no assumption about the link between species or sample attributes and species*  
266 *composition*

267 This category includes mostly observational studies without prior assumptions or expectations  
268 about a link between any of the matrices. The null hypothesis states that there is no link between  
269 species or sample attributes and the matrix species composition. To reject this null hypothesis  
270 means to prove that both species and sample attributes are linked to species composition.  
271 Empirical studies describing the general relationship between sample attributes and species  
272 attributes, without explicitly or implicitly acknowledging some underlying assumption or  
273 mechanism, belong to this category. Examples are studies relating the CWM of functional traits

274 to environmental variables without a clear assumption that traits are functional, allowing to  
275 question whether particular traits are linked to species composition or not. Studies with species  
276 indicator values relating mean indicator values to environmental variables also fit this category  
277 (e.g. answering the question of whether Ellenberg indicator values for soil reaction *per se* are  
278 good predictors of measured soil pH).

279

### 280 **Illustration of the bias and its dependence on beta diversity**

281 If we test hypotheses from categories A and C by the weighted-mean approach with the standard  
282 test, results may be highly biased, both regarding the estimated model parameters and the  
283 inflated Type I error rate (Zelený & Schaffers 2012; Peres-Neto et al. 2016; Hawkins et al. 2017).  
284 In the next section, I will illustrate this bias using simulated community data, where each  
285 community data set will be accompanied with (vectors of) species and sample attributes linked  
286 (or not) to species composition. To show also the dependence of the bias on the heterogeneity of  
287 species composition, I will generate sets of species composition matrices of increasing beta  
288 diversity. Later, I will use the same simulated data sets to demonstrate the performance of  
289 available statistical solutions.

### 290 *Description of 2D simulated community data set*

291 The algorithm generating community data is an extension of the one proposed by Fridley et al.  
292 (2007) and is structured by two virtual ecological gradients. I call it *2D simulated community*  
293 *data set* throughout this paper, to distinguish it from an alternative algorithm introduced by Dray

294 & Legendre (2008) structured by only one virtual ecological gradient (and called *ID simulated*  
295 *community data set* here). Along each virtual gradient, a certain number of unimodal species  
296 response curves were generated, where response curve quantifies the potential probability that  
297 individual found in the certain location of the gradient would be assigned to given species.  
298 Community samples were then generated by randomly selecting locations along the gradients  
299 and assigning given the number of individuals into species according to species probabilities at  
300 given gradient location. Sample locations along the first gradient were used as sample attributes,  
301 while optima of species response curves along the first gradients were used as species attributes.  
302 The function of the second gradient is to modify the beta diversity of the dataset; increasing the  
303 length of the second gradient (along to the increasing number of species) results in increased beta  
304 diversity of the species composition matrix (Appendix S1: Table S1 and Fig. S1). The range of  
305 species niche widths was between 500 and 1000 units, and niche widths were generated  
306 independently for each gradient. The length of the first gradient was arbitrarily set to 1000 units,  
307 while the length of the second gradient varied between 1000 to 10 000 units. I assumed that 1000  
308 units of the second gradient represent one community, i.e. enlarging the second gradient from  
309 1000 to 10 000 units (by steps of 1000 units) generates a set of data sets with 1 to 10  
310 communities. For more details, see Appendix S1.

311 As a result, each simulated community data set includes a matrix of sample attributes (**R**),  
312 species composition (**L**) and species attributes (**Q**), in which sample attributes and species  
313 attributes are linked to species composition. In the next step, the link between species or sample  
314 attributes and species composition (or both) was broken by the permutation of attributes to create  
315 four scenarios (Fig. 1, identical with scenarios 1–4 of Dray & Legendre 2008): 1) both sample

316 and species attributes are linked to species composition; 2) sample attributes are linked to species  
317 composition, species attributes are not; 3) species attributes are linked to species composition,  
318 sample attributes are not; 4) none of the species or sample attributes is linked to species  
319 composition. For studies from category A defined above, scenario 2 represents the null  
320 hypothesis, for category B scenario 3 is the null hypothesis, and for category C the scenarios 2, 3  
321 and 4 represent alternative states of the null hypothesis (Table 1 and Fig. 1). Scenario 1  
322 represents the power test for all three categories (i.e. it measures the probability of getting  
323 significant results if the alternative hypothesis is true). Note that in the simulated data example,  
324 sample and species attributes are matrices with a single column (vectors), yet for simplicity, I  
325 keep using the matrix notation, i.e. **R** and **Q** instead of **r** and **q**.

326 For the comparison with results of the study by Peres-Neto et al. (2016), I calculated all  
327 analyses also using *1D simulated community data set* (results available in Appendix S3). This  
328 model generated rather homogeneous communities (Appendix S1: Table S1 vs. Appendix S3:  
329 Table S2), and the increase in beta diversity was achieved by narrowing the niche breadth of  
330 individual species (keeping the gamma diversity of the data set constant but decreasing the mean  
331 alpha diversity). In contrast, in 2D simulated community data set the increase in beta diversity  
332 was achieved by prolonging the second virtual gradient (which increases gamma diversity while  
333 keeping the mean alpha diversity rather constant).

334 All analyses were conducted using R-project (version 3.3.3, R Foundation for Statistical  
335 Computing, Vienna, Austria, <https://www.R-project.org/>); complete R-script is available in  
336 Appendix S4, and all functions are in R-package *weimea* (abbreviation for the *weighted mean*;



337 source code of version 0.64 is in Appendix S5, actual version can be found at  
338 <https://github.com/zdealveindy/weimea>).

339 *Weighted-mean approach with standard test applied on simulated data*

340 For each of the four scenarios (1–4) I created ten levels of beta diversity, and for each  
341 combination of *scenario*  $\times$  *level of beta diversity*, I created 1000 datasets (4 scenarios  $\times$  10 levels  
342 of beta diversity  $\times$  1000 replications = 40 000 data sets). For each data set, I calculated the CWM  
343 of species attributes, related it to sample attributes using Pearson's  $r$  correlation and tested its  
344 significance using the parametric  $t$ -test (for additional results for least-square regression and  $r^2$   
345 see Appendix S2: Fig. S1). For each level of community beta diversity in each scenario, I  
346 counted the proportion of correlations significant at  $\alpha = 0.05$  (note that this proportion is  
347 identical to the proportion of significant regressions).

348 From the three scenarios with no direct link between species and sample attributes  
349 (scenarios 2, 3 and 4), analysis of data generated by scenario 2 reveals the bias – the correlation  
350 coefficient deviates from zero more than in other cases (Fig. 2), and the test of significance  
351 shows an inflated Type I error rate (Fig. 3). This bias decreases with increasing beta diversity of  
352 the species composition matrix (Fig. 2 & 3, Scenario 2): for the most homogeneous data set  
353 (*level of beta diversity* = 1), the range of Pearson's  $r$  correlation coefficients (expressed as 2.5%  
354 and 97.5% quantiles) is between -0.761 and 0.782, with 58% of correlations significant, while  
355 for the most heterogeneous data set with a high beta diversity (*level of beta diversity* = 10) the  
356 range of Pearson's  $r$  values is between -0.399 and 0.390 (2.5 and 97.5% quantile range), with  
357 17% of correlations significant. For comparison, the most homogeneous datasets in scenarios 3

358 and 4 have the values of  $r$  on average between -0.286 and 0.275 (2.5 and 97.5% quantile range)  
359 with the number of significant results 5.7%, i.e. close to expected 5%. Similarly inflated are the  
360 values of coefficient of determination ( $r^2$ ; Appendix S2: Fig. S1, Scenario 2) calculated by least-  
361 square linear regression. Applying the standard test on the simulated community data set of Dray  
362 & Legendre (2008) shows analogously biased results (Appendix S3: Table S1 and Fig. S2a).

363

### 364 **Available solutions and their comparison**

365 To my knowledge, there are two approaches that have been used to solve the bias in the  
366 weighted-mean approach. One is the *modified permutation test*, which was introduced by Zelený  
367 & Schaffers (2012) in the context of relating the CWM of Ellenberg-like species indicator values  
368 with internal variables (e.g. ordination scores or species richness calculated from the same  
369 species composition data set). Another one is the *sequential permutation test* using the *fourth-*  
370 *corner statistic*, introduced first in the electronic appendix of the study by Peres-Neto et al. (2012,  
371 Appendix A) and later in a re-elaborated version in Peres-Neto et al. (2016). Here I review the  
372 strengths and weaknesses of both approaches, test their performance using simulated community  
373 data and suggest guidelines for their use. Both 2D and 1D simulated community data sets have  
374 been used, with results of the two-gradient version reported in the main paper and those of one-  
375 gradient version in Appendix S3. Note that studies in category B are not prone to the bias if the  
376 weighted-mean approach with the standard test is used, and reviewed solutions are therefore  
377 relevant only for studies in categories A and C.

378 *Modified permutation test: comparison with the results of a null model*

379 Standard permutation test of the relationship between sample attributes and CWM of species  
380 attributes compares observed test statistic (e.g. t-value for correlation or F-value for regression)  
381 with expected null distribution of this test statistic generated by repeatedly randomizing one of  
382 the compared variables (e.g. by randomizing CWM values between samples). *Modified*  
383 *permutation test* modifies the way how the null distribution is generated, and instead of  
384 generating CWM values between samples, it calculates CWM on species attributes randomized  
385 among species (or randomly generated ones). CWM calculated from randomized species  
386 attributes ( $CWM_{rand}$ ) inherit the same level of compositional autocorrelation as CWM calculated  
387 from the real species attributes ( $CWM_{obs}$ ) because they are calculated by the same algorithm  
388 from the same species composition matrix. This is analogous to testing the relationship between  
389 spatially autocorrelated variables using toroidal shift, when one spatially explicit variable is  
390 permuted in a way that it preserves the original degree of spatial autocorrelation (Fortin & Dale  
391 2005), or, alternatively, random variables with the same degree of spatial autocorrelation as that  
392 of the original one can be generated (Deblauwe et al. 2012).

393 I used 2D and 1D simulated community data sets to calculate the correlation of CWM  
394 sample attributes for all four scenarios in communities of increasing beta diversity and tested the  
395 significance of this correlation using the modified permutation test. Results on 2D data set show  
396 that in contrast to the standard permutation test (Fig. 3), the originally inflated Type I error rate  
397 in the case of scenario 2 disappears (Fig. 4). At the same time, in the case of scenario 3 the test is  
398 slightly conservative for data sets of low beta diversity. The same conclusion applies if the  
399 modified permutation test is used on 1D simulated community data set, in which the results for  
400 scenario 3 are even more conservative (almost no significant correlations, Appendix S3: Table

401 S1 and Fig. S2a), since the community data set has a rather low beta diversity (Appendix S3:  
402 Table S2). Additional detail power analysis on the 1D simulated community data set with added  
403 random noise reveals that the modified permutation test loses power when both sample size and  
404 species number decrease (Appendix S3: Fig. S1a), and also when species tolerances increase  
405 (Appendix S3: Fig. S1b; note that with increasing species tolerance, beta diversity of the species  
406 composition matrix decreases).

407 The modified permutation test is suitable for testing hypotheses in both categories A and  
408 C, since for both scenario 2 is relevant for testing the null hypothesis. In the case of category C,  
409 however, it is not suitable for data sets with very low beta diversity, for which results of  
410 modified permutation test in scenario 3 are overly conservative.

#### 411 *Sequential permutation test with the fourth-corner statistic*

412 Dray & Legendre (2008) noted that the fourth-corner statistic  $r$ , introduced by Legendre et al.  
413 (1997), is “equal to the slope of the linear model, weighted by total species abundance, with the  
414 niche centroids as the response variable and the species trait as the explanatory variable.” This  
415 analogy was further elaborated by Peres-Neto et al. (2012, Appendix A) and Peres-Neto et al.  
416 (2016), who presented an algorithm for how to use the *fourth-corner* statistic  $r$  in the weighted-  
417 mean approach. In short, both  $\mathbf{R}$  and  $\mathbf{Q}$  matrices are first centered by the weighted mean of row  
418 sums of  $\mathbf{L}$  (in the case of  $\mathbf{R}$ ) and column sums of  $\mathbf{L}$  (in the case of  $\mathbf{Q}$ ), and then standardized.  
419 The fourth-corner  $r$  statistic is then the slope of weighted regression between the weighted mean  
420 of centered plus standardized  $\mathbf{Q}$  and centered plus standardized  $\mathbf{R}$ , weighted by row sums of  $\mathbf{L}$ .  
421 The main advantage of the fourth-corner statistic is the option to use the *sequential permutation*

422 *test* introduced by ter Braak et al. (2012), which combines results of tests based on permuting  
423 sample attributes (model 2 in Legendre et al. 1997) and species attributes (model 4). If the first  
424 test is significant, then the second test is done, and overall significance of the result is equal to  
425 the higher of these two tests' *P*-values. When applied to the 2D simulated community data set,  
426 this test gives unbiased results for all scenarios (Appendix S2: Fig. S3), although being more  
427 conservative in the case of homogeneous data sets in scenario 4, which is relevant for category C  
428 (results calculated on the 1D simulated data set also confirm this finding, see Appendix S3:  
429 Table S1 and Fig. S2b). Power analysis (Appendix S3: Fig. S1c,d) reveals a performance very  
430 similar to that of the modified permutation test. The sequential test with the fourth-corner  
431 statistic is, therefore, suitable for testing hypotheses from all three categories, although in the  
432 case of category B it is not needed (standard permutation test gives unbiased results) and in the  
433 case of category C it is overly conservative for homogeneous community data sets (scenario 4 on  
434 Fig. 4). A disadvantage is that the sequential test with the fourth-corner statistic is restricted only  
435 to the weighted regression/correlation between centered and standardized species and sample  
436 attributes, weighted by row sums of a species composition matrix ( $L$ ). This may not be  
437 appropriate e.g. in the case of presence-absence species composition data if CWM are related to  
438 species richness (as sample attributes). The regression relating CWM to species richness would  
439 then be weighted by species richness (row sums in presence-absence species composition data  
440 equal to species richness), in which case more species-rich samples would have a higher weight  
441 in the analysis (Hawkins et al. 2017). Sequential test with the fourth-corner statistic is, therefore,  
442 more like a special case of weighted-mean approach, which also includes other methods such as

443 non-weighted regression, correlation or ANOVA, does not require standardizing species and  
444 sample attributes and does not weight the samples by sums of their species abundances.

445

## 446 **Discussion**

447 The main motivation of this study was to show that the results of the weighted-mean approach  
448 critically depend on the correct decision regarding the test used for statistical inference. To help  
449 in this decision process, I suggested that each ecological question analyzed by weighted-mean  
450 approach should be classified into one of the three categories, given the explicit (or implicit)  
451 assumptions about the role of species and sample attributes. For each category, I suggested an  
452 optimal strategy for testing the significance of the relationship between the CWM and sample  
453 attributes, summarized in Table 1. The choice of the appropriate category is not always  
454 straightforward. For example, trait studies testing whether an environment is filtering the species  
455 into a community via their functional traits routinely assume that such traits are functional, and  
456 in the weighted-mean approach they are considered as linked to species composition (category  
457 B). However, this assumption may not always be justified; included traits are often those readily  
458 available in databases and/or those which are relatively easy to measure, but these do not  
459 necessarily need to be the functional ones (Mlambo 2014). In the case of compositionally  
460 relatively homogeneous data sets, even the traits with no ecological meaning may show a high  
461 and significant relationship to environmental variables if tested by standard tests. I believe that  
462 this calls for a revision of such commonly applied practice.

463           The analogy between the bias in the weighted-mean approach to the bias in the analysis  
464 of spatially autocorrelated variables suggests some other alternatives to reduce or remove the  
465 bias. One is to stratify the data set to reduce redundancy in species composition among samples  
466 and increase the overall beta diversity of the compositional data set, e.g. by removing one sample  
467 from pairs of samples with similar species composition. Although methods for stratification  
468 based on species composition are available (e.g. Lengyel et al. 2011), this potentially results in  
469 throwing out a large number of expensive data. Another option would be to apply some  
470 correction for effective degrees of freedom in analysis, analogous to a method estimating the  
471 effective number of samples in the case of autocorrelated variables (Dutilleul 1993), or to apply  
472 methods capable of dealing with autocorrelated residuals (analogy of geographically weighted  
473 regressions).

474           The power test using the simulated data set showed that the power of both the modified  
475 permutation test and the sequential permutation test with the fourth-corner statistic decreases  
476 with a decrease in the number of species and/or the number of samples. This makes these tests  
477 less suitable for smaller and relatively homogeneous data sets with few species (e.g. less than 40)  
478 since the probability of Type II error (i.e. not rejecting the null hypothesis, which is false)  
479 strongly increases. Additionally, in the case of compositional data sets with low beta diversity,  
480 the modified permutation test is overly conservative for scenario 3, while the sequential  
481 permutation test with the fourth-corner statistic is conservative for scenario 4. Both tests are  
482 therefore less suitable for testing hypotheses in category C in the case that compositional data set  
483 is rather homogeneous.

484           In this study, I explicitly ignored intraspecific variation in species attributes, focusing  
485 only on the use of data set-wide mean species attribute values. Indeed, intraspecific variation  
486 may be important, e.g. in the context of functional traits, where the intraspecific variation gains  
487 increasing attention (Albert et al. 2012). The question whether the inclusion of intraspecific  
488 variation (e.g. by including trait values that are sample-specific, not data set-wide) influences the  
489 potential bias reported in this study requires further examination and goes beyond this study. I  
490 assume, however, that including another source of variation (species-level variation in species  
491 attributes) does not remove the problem of the bias itself but makes the estimation of the bias and  
492 its correction more complex.

493           Finally, the relevant consideration is whether the weighted-mean approach is actually the  
494 best analytical solution for the question we aim to answer. In some cases, the question is  
495 explicitly focused on relating community-level values of species attributes, like mean Ellenberg-  
496 like species indicator values (serving as an estimate of ecological conditions for individual sites)  
497 or the CWM of traits (as one of the functional-diversity metrics and as a community-level trait  
498 value), and the use of the weighted-mean approach is fully justified. In other cases, when the  
499 question is focused on relating individual species-attributes to sample attributes, the weighted-  
500 mean approach may not be the best analytical choice. A better solution may be to use alternative  
501 options, such as the fourth-corner (Legendre et al. 1997) or RLQ (Dolédec et al. 1996) analysis,  
502 for which the problem of inflated Type I error rate and choice of the suitable permutation test  
503 have already been solved.

504



## 505 **Conclusions**

506 In this study, I draw attention to the problem of the weighted-mean approach, which I believe is  
507 largely overlooked and not acknowledged, although it represents a source of potentially serious  
508 misinterpretations. Since in certain fields of vegetation ecology the weighted-mean approach is  
509 gaining increasing momentum (e.g. in functional ecology with the CWM of species functional  
510 traits as one of the functional-diversity indices), I suggest that the time is ripe to critically assess  
511 in which situations and for which types of hypotheses the commonly used standard parametric or  
512 permutation tests are inappropriate, since they yield results that may be overly optimistic.

513

## 514 **Acknowledgements**

515 This study was supported by the Czech Science Foundation (P505/12/1022) and Ministry of  
516 Science and Technology, Taiwan (MOST 105-2621-B-002-004). My thanks go to Bill Shipley,  
517 Cajo ter Braak and several anonymous reviewers for critical comments on previous versions of  
518 this manuscript, which motivated me to several times heavily rework it. Thanks also go to Pedro  
519 Péres-Neto and Stéphane Dray for (emotional) discussion of differences between my modified  
520 permutation test solution and their fourth-corner one during the ISEC 2014 conference in  
521 Montpellier.

522

## 523 **Supporting information**

524 **Appendix S1.** Description of an algorithm generating simulated community data along two  
525 environmental gradients (*2D simulated community data set*).

526 **Appendix S2.** Weighted-mean approach applied to 2D simulated community data sets:  
527 additional results.

528 **Appendix S3.** Evaluation of permutation tests using 1D simulated community data set from  
529 Dray & Legendre (2008).

530 **Appendix S4.** R-code for all analyses.

531 **Appendix S5.** Source code for the R library *weimea*, version v. 0.64 (actual version can be found  
532 on <https://github.com/zdealveindy/weimea/>).

533

## 534 **References**

535 Albert, C. H., de Bello, F., Lavorel, S. & Thuiller, W. 2012. On the importance of intraspecific  
536 variability for the quantification of functional diversity. *Oikos* 121: 116–126.

537 Axmanová, I., Tichý, L., Fajmonová, Z., Hájková, P., Hettengergerová, E., Li, C.-F., Merunková,  
538 K., Nejezchlebová, M., Otýpková, Z., Vymazalová, M. & Zelený, D. 2012. Estimation of  
539 herbaceous biomass from species composition and cover. *Applied Vegetation Science* 15: 580–  
540 589.

- 541 Birks, H. J. B., Line, J.M., Juggins, S., Stevenson, A.C. & ter Braak, C.J.F. 1990. Diatoms and  
542 pH reconstruction. *Philosophical Transactions of the Royal Society B Biological Sciences*  
543 327: 263–278.
- 544 Brown, A.M., Warton, D.I., Andrew, N.R., Binns, M., Cassis, G. & Helois, G. 2014. The fourth-  
545 corner solution – using predictive models to understand how species traits interact with the  
546 environment. *Methods in Ecology and Evolution* 5: 344–352.
- 547 Carboni, M., Zelený, D. & Acosta, A. 2016. Measuring ecological specialization along a natural  
548 stress gradient using a set of complementary niche breadth indices. *Journal of Vegetation*  
549 *Science* 27: 892–203.
- 550 Chytrý, M., Hejčman, M., Hennekens, S.M. & Schellberg, J. 2009. Changes in vegetation types  
551 and Ellenberg indicator values after 65 years of fertilizer application in the Rengen Grassland  
552 Experiment, Germany. *Applied Vegetation Science* 12: 167–176.
- 553 Clavero, M. & Brotons, L. 2010. Functional homogenization of bird communities along habitat  
554 gradients: accounting for niche multidimensionality. *Global Ecology and Biogeography* 19: 684–  
555 696.
- 556 Deblauwe, V., Kennel, P. & Couteron, P. 2012. Testing pairwise association between spatially  
557 autocorrelated variables: a new approach using surrogate lattice data. *PLOS One* 7: e48766.
- 558 Díaz, S., Cabido, M. & Casanoves, F. 1998. Plant functional traits and environmental filters at a  
559 regional scale. *Journal of Vegetation Science* 9: 113–122.

- 560 Díaz, S., Lavorel, S., de Bello, F., Quétler, F., Grigulis, K. & Robson, T.M. 2007. Incorporating  
561 plant functional diversity effects in ecosystem service assessments. *Proceedings of the National*  
562 *Academy of Sciences USA* 104: 20684–20689.
- 563 Dolédec, S., Chessel, D., ter Braak, C.J.F. & Champely, S. 1996. Matching species traits to  
564 environmental variables: a new three-table ordination method. *Environmental and Ecological*  
565 *Statistics* 3: 143–166.
- 566 Dray, S. & Legendre, P. 2008. Testing the species traits-environment relationships: the fourth-  
567 corner problem revisited. *Ecology* 89: 3400–3412.
- 568 Dutilleul, P. 1993. Modifying the t test for assessing the correlation between two spatial  
569 processes. *Biometrics* 49: 305–314.
- 570 Ellenberg, H., Weber, H.E., Düll, R., Wirth, V., Werner, W. & Paulissen, D. 1992. Zeigerwerte  
571 von Pflanzen in Mitteleuropa. Second Edition. *Scripta Geobotanica* 18: 1–248.
- 572 Fajmonová, Z., Zelený, D., Syrovátka, V., Vončina, G. & Hájek, M. 2013. Distribution of habitat  
573 specialists in semi-natural grasslands. *Journal of Vegetation Science* 24: 616–627.
- 574 Fortin, M.-J. & Dale, M.R.T. 2005. *Spatial analysis. A guide for ecologists*. Cambridge  
575 University Press, New York, USA.
- 576 Fridley, J.D., Vandermast, D.B., Kuppinger, D.M., Manthey, M. & Peet, R.K. 2007. Co-  
577 occurrence based assessment of habitat generalists and specialists: a new approach for the  
578 measurement of niche width. *Journal of Ecology* 95: 707–722.

- 579 Garnier, E., Cortez, J., Billès, G., Navas, M.L., Roumet, C., Debussche, M., Laurent, G.,  
580 Blanchard, A., Aubry, D., (...) & Neill, C. 2004. Plant functional markers capture ecosystem  
581 properties during secondary succession. *Ecology* 85: 2630–2637.
- 582 Hawkins, B.A. & Diniz-Filho, J.A.F. 2006. Beyond Rapoport's rule: evaluating range size  
583 patterns of New World birds in a two-dimensional framework. *Global Ecology and*  
584 *Biogeography* 15: 461–469.
- 585 Hawkins, B.A., Leroy, B., Rodríguez, M.Á., Singer, A., Vilela, B., Villalobos, F., Wang X. &  
586 Zelený D. 2017. Structural bias in aggregated species-level variables driven by repeated species  
587 co-occurrences: a pervasive problem in community and assemblage data. *Journal of*  
588 *Biogeography*, DOI: 10.1111/jbi.12953.
- 589 Jamil, T., Ozinga, W.A., Kleyer, M. & ter Braak, C.J.F. 2013. Selecting traits that explain  
590 species-environment relationships: a generalized linear mixed model approach. *Journal of*  
591 *Vegetation Science* 24: 988–1000.
- 592 Jansen, F., Ewald, J. & Zerbe, S. 2011. Ecological preferences of alien plant species in North-  
593 Eastern Germany. *Biological Invasions* 13: 2691–2701.
- 594 Kelly, M.G. & Whitton, B.A. 1995. Biological monitoring of eutrophication in rivers.  
595 *Hydrobiologia* 384: 55–67.
- 596 Legendre, P. 1993. Spatial autocorrelation: trouble or new paradigm? *Ecology* 74: 1659–1673.

- 597 Legendre, P., Galzin, R. & Harmelin-Vivien, M.L. 1997. Relating behavior to habitat: solutions  
598 to the fourth-corner problem. *Ecology* 78: 547–562.
- 599 Legendre, P. & Legendre, L. 2012. *Numerical ecology, Third English Edition*. Elsevier Science,  
600 Amsterdam, The Netherlands.
- 601 Lengyel, A., Chytrý, M. & Tichý, L. 2001. Heterogeneity-constrained random resampling of  
602 phytosociological databases. *Journal of Vegetation Science* 22: 175–183.
- 603 Mlambo, M.C. 2014. Not all traits are ‘functional’: insights from taxonomy and biodiversity-  
604 ecosystem functioning research. *Biodiversity and Conservation* 23: 781–790.
- 605 Nygaard, B. & Ejrnaes, R. 2004. A new approach to functional interpretation of vegetation data.  
606 *Journal of Vegetation Science* 15: 49–56.
- 607 Peres-Neto, P.R., Leibold, M.A. & Dray, S. 2012. Assessing the effects of spatial contingency  
608 and environmental filtering on metacommunity phylogenetics. *Ecology* 93: S14–S30.
- 609 Peres-Neto, P.R., Dray, S. & ter Braak, C.J.F. 2016. Linking trait variation to the environment:  
610 critical issues with community-weighted mean correlation resolved by the fourth-corner  
611 approach. *Ecography*, DOI: 10.1111/ecog.02302
- 612 Persson S. 1981. Ecological indicator values as an aid in interpretation of ordination diagrams.  
613 *Journal of Ecology* 69: 71–84.

- 614 Schaffers, A.P. & Sýkora, K.V. 2000. Reliability of Ellenberg indicator values for moisture,  
615 nitrogen and soil reaction: comparison with field measurements. *Journal of Vegetation Science*  
616 11: 225–244.
- 617 Shipley, B. 2010. *From plant traits to vegetation structure. Chance and selection in the assembly*  
618 *of ecological communities*. Cambridge University Press, Cambridge, UK.
- 619 Šmilauer, P. & Lepš J. 2014. *Multivariate analysis of ecological data using CANOCO 5*. 2nd ed.  
620 Cambridge University Press, Cambridge, UK.
- 621 ter Braak, C.J.F. & Barendregt, L.G. 1986. Weighted averaging of species indicator values: its  
622 efficiency in environmental calibration. *Mathematical Biosciences* 78: 57–72.
- 623 ter Braak, C.J.F. & Looman, C.W.N. 1986. Weighted averaging, logistic regression and the  
624 Gaussian response model. *Vegetatio* 65: 3–11.
- 625 ter Braak, C.J.F., Cormont, A. & Dray, S. 2012. Improved testing of species traits-environment  
626 relationships in the fourth-corner problem. *Ecology* 93: 1525–1526.
- 627 Vile, D., Shipley, B. & Garnier, E. 2006. Ecosystem productivity can be predicted from potential  
628 relative growth rate and species abundance. *Ecology Letters* 9: 1061–1067.
- 629 Zelený, D. & Schaffers, A.P. 2012. Too good to be true: pitfalls of using mean Ellenberg  
630 indicator values in vegetation analyses. *Journal of Vegetation Science* 23: 419–431.
- 631

632 *Table 1*

633 Overview of the characteristics of the three categories of hypotheses tested by the *weighted-*  
 634 *mean* approach. For each category, the corresponding assumption about a link between sample  
 635 attributes (**R**) or species attributes (**Q**) and species composition (**L**) is provided, as well as the  
 636 null vs alternative hypothesis, a scenario within the simulated data relevant in the context of a  
 637 given category (see Fig. 1), and the recommended test (standard: standard parametric or  
 638 permutation test; modified: modified permutation test; sequential with 4c: the sequential  
 639 permutation test with the fourth-corner statistic).

| Category of hypotheses        |                           | A                                                                                        | B                                                                                         | C                                                                                                 |
|-------------------------------|---------------------------|------------------------------------------------------------------------------------------|-------------------------------------------------------------------------------------------|---------------------------------------------------------------------------------------------------|
| <b>Assumption</b>             |                           | sample attributes linked to the matrix of species composition ( <b>R</b> <--> <b>L</b> ) | species attributes linked to the matrix of species composition ( <b>Q</b> <--> <b>L</b> ) | no assumption about the link of species or sample attributes to the matrix of species composition |
| <b>Null hypothesis</b>        |                           | <b>Q</b> <-//-> <b>L</b>                                                                 | <b>R</b> <-//-> <b>L</b>                                                                  | <b>R</b> <-//-> <b>Q</b> ,<br>i.e. <b>R</b> <-//-> <b>L</b> and/or<br><b>Q</b> <-//-> <b>L</b>    |
| <b>Alternative hypothesis</b> |                           | <b>Q</b> <--> <b>L</b>                                                                   | <b>R</b> <--> <b>L</b>                                                                    | <b>R</b> <--> <b>Q</b> ,<br>i.e. <b>R</b> <--> <b>L</b> and<br><b>Q</b> <--> <b>L</b>             |
| <b>Relevant scenario(s)</b>   |                           | Scenario 2                                                                               | Scenario 3                                                                                | Scenarios 2, 3 and 4                                                                              |
| <b>Recommended test</b>       | <b>standard</b>           | no (biased result)                                                                       | yes                                                                                       | no (biased result)                                                                                |
|                               | <b>modified</b>           | yes                                                                                      | no                                                                                        | yes*                                                                                              |
|                               | <b>sequential with 4c</b> | yes                                                                                      | yes                                                                                       | yes*                                                                                              |

640 \* too conservative if the beta diversity of the species composition matrix is low

641 <-//-> - no link between the two matrices, <--> - link between the two matrices.



642 **Figure captions**

643 **Figure 1.** Conceptual differences between scenarios 1 to 4 in the simulated community data and  
644 the link of these scenarios (gray boxes at the top) to categories A to C (black boxes at the  
645 bottom). In scenario 1, both sample attributes (**R**) and species attributes (**Q**) are linked to the  
646 matrix of species composition (**L**), while in the other three scenarios one or both types of  
647 attributes are without the link to species composition (notified by “?” in the schema). The link of  
648 attributes to species composition was removed by permuting the values of species attributes  
649 (scenario 2), sample attributes (scenario 3) or both (scenario 4). The matrix of species attributes  
650 is transposed (**Q'**) to match the dimension of the matrix of species composition (**L**). In simulated  
651 data, both sample and species attributes are represented by a matrix of only one column (yet still  
652 using the notation for a matrix).

653 **Figure 2.** Pearson's  $r$  correlation coefficients among CWM and sample attributes for each of the  
654 four scenarios and ten levels of beta diversity (1000 correlations for each combination have been  
655 conducted). Grey horizontal bars are outliers.

656 **Figure 3.** The proportion of significant correlations ( $P < 0.05$ ) between CWM and sample  
657 attributes, tested by standard parametric  $t$ -test. For each of the four scenarios and ten levels of  
658 beta diversity, 1000 simulated community data sets have been generated and tested.

659 **Figure 4.** The proportion of significant correlations ( $P < 0.05$ ) between CWM and sample  
660 attributes, tested by modified permutation test (white bars) and sequential test with fourth-corner  
661  $r$  statistic (gray bars). For each of the four scenarios and ten levels of beta diversity, 1000  
662 simulated community data sets have been generated and tested by each method.

663 *Figure 1*

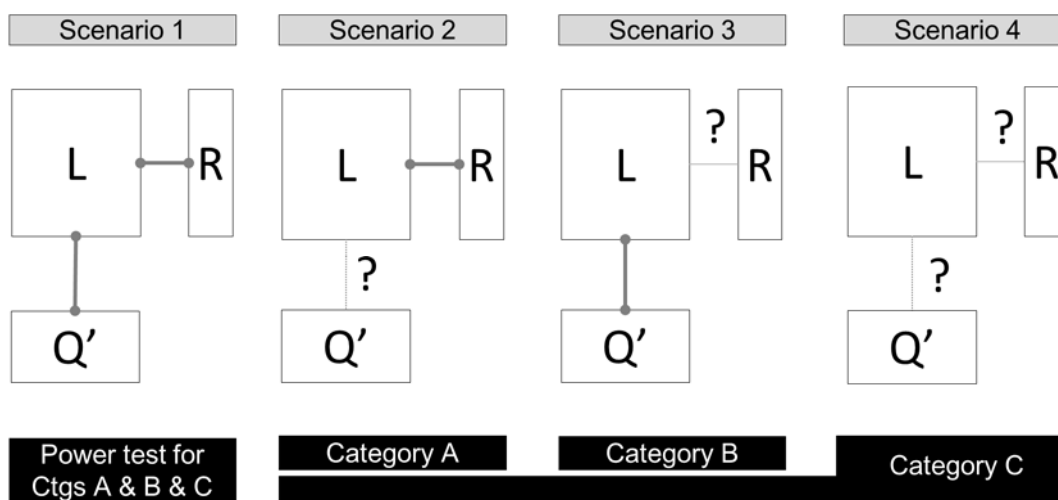

664

665

666 *Figure 2*

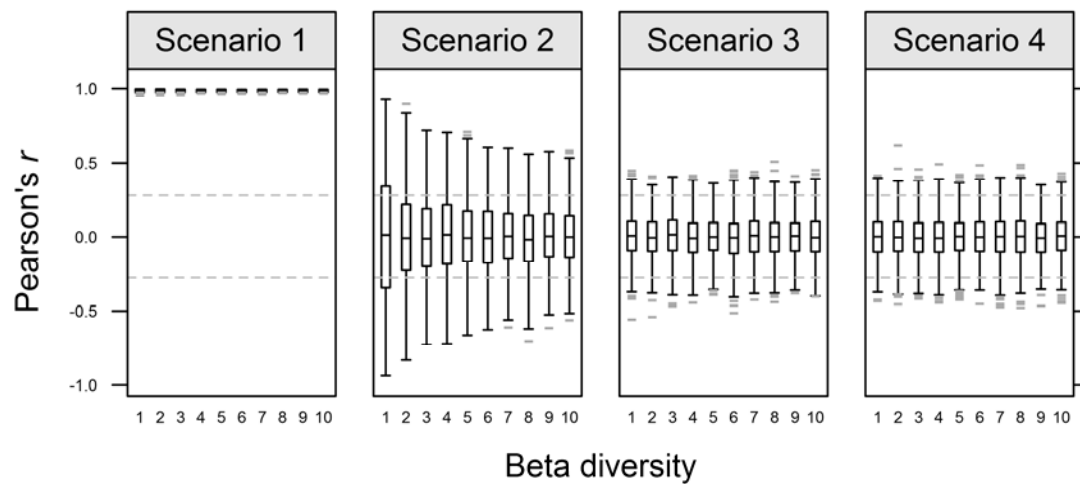

667

668

669 *Figure 3*

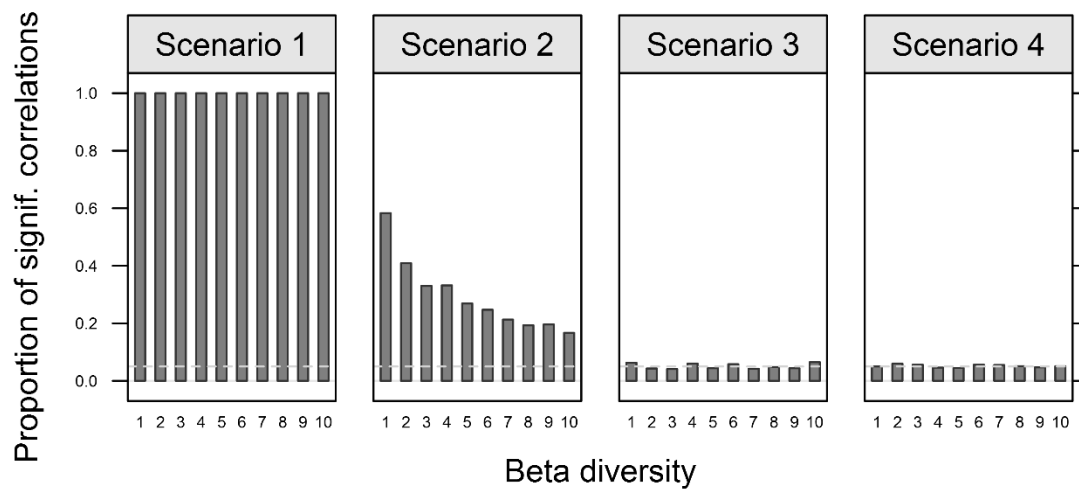

670

671

672 *Figure 4*

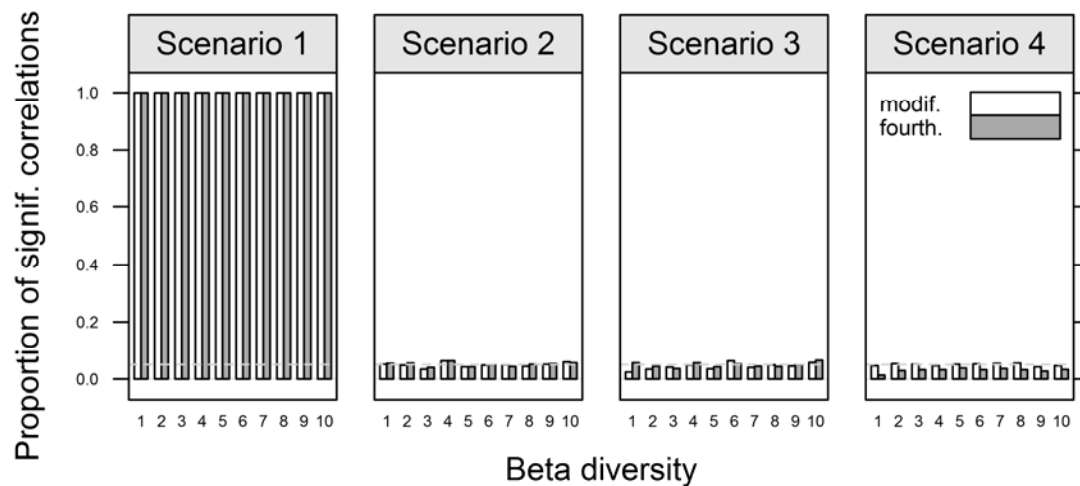

673
